# Supplementary material for: Applications of voltammetric ion selective electrodes to complex matrices
Source: Royal Society of Chemistry journal article supplement (doi:10.1039/c3ay40769a), 2013-01-01
Supplement: c3ay40769a.pdf [file c3ay40769a.pdf]

# Applications of Voltammetric Ion Selective Electrodes to Complex Matrices

## Supporting Information

Alexander R. Harris<sup>a1\*</sup>, Jie Zhang<sup>a</sup>, Robert W. Cattrall<sup>b</sup> and Alan M. Bond<sup>a\*</sup>

<sup>a</sup> School of Chemistry, Monash University, Clayton, Victoria, 3800, Australia

<sup>b</sup> Department of Chemistry, La Trobe University, Bundoora, Victoria, 3086, Australia

*Keywords: Ion selective electrodes, polymer membrane ISEs, cyclic voltammetry, blood analysis*

\*E-mail address: alex.harris@latrobe.edu.au; alan.bond@monash.edu

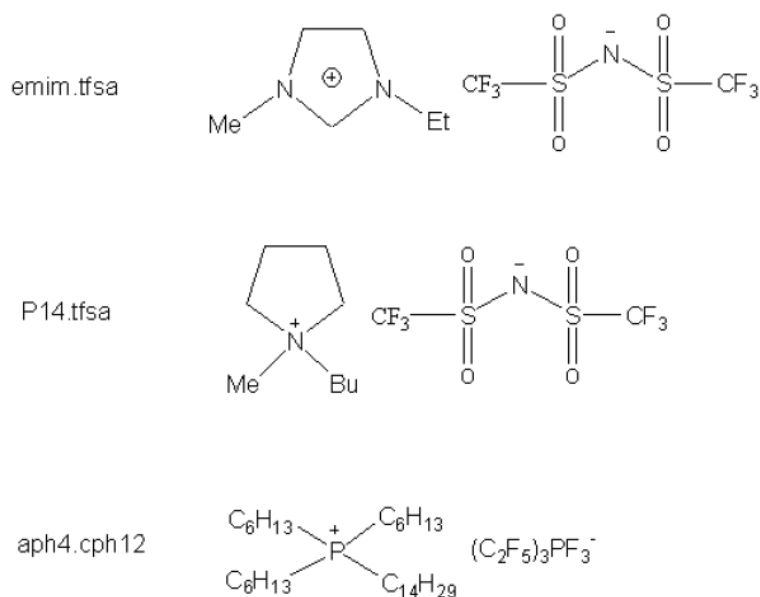

Figure S1. Structures of ionic liquids.

Table S1: Statistical data from the AEROSSET 2 at the John Radcliffe Hospital.

| Ion              | Lower calibrant average activity /mM | Coefficient of Variation | Upper calibrant average activity /mM | Coefficient of Variation |
|------------------|--------------------------------------|--------------------------|--------------------------------------|--------------------------|
| Na <sup>+</sup>  | 122                                  | 0.9                      | 156                                  | 0.5                      |
| K <sup>+</sup>   | 2.7                                  | 1.7                      | 6.2                                  | 0.9                      |
| Ca <sup>2+</sup> | 1.86 *                               | 1.5                      | 2.77 *                               | 1.1                      |

\*total concentration

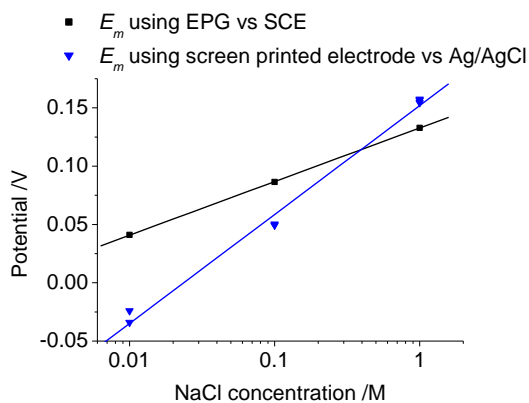

Figure S2.  $E_m$  versus NaCl concentration calibration curve of the TCNQ microcrystal sensor and response using the 10<sup>th</sup> potential cycle on EPG with an SCE reference electrode (black) and on a planar macrodisc screen printed electrode with a Ag/AgCl reference electrode with no salt bridge (blue).

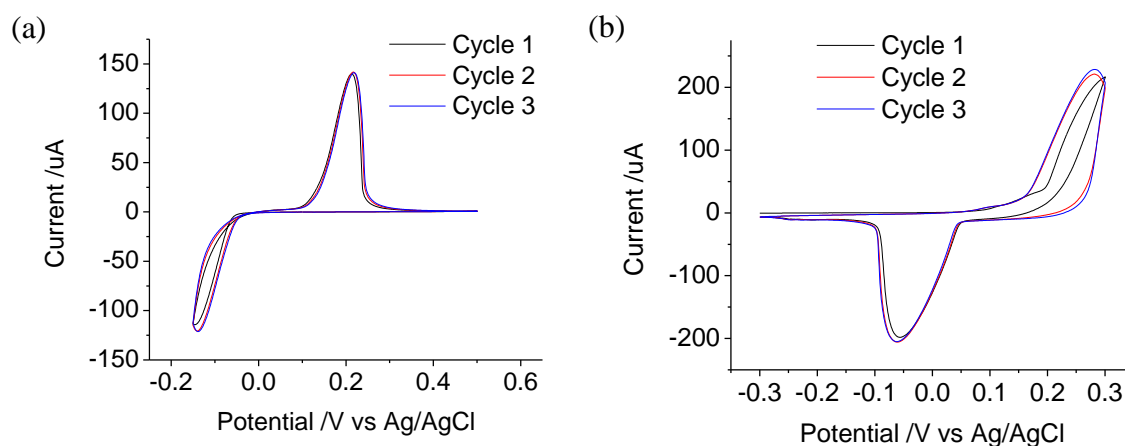

Figure S3: First three potential cycles in 0.1 M NaCl, 50 mM TRIS and HEPES at a scan rate of  $100 \text{ mV s}^{-1}$  of mechanically adhered (a) TCNQ and (b) TTF on screen printed planar electrodes.

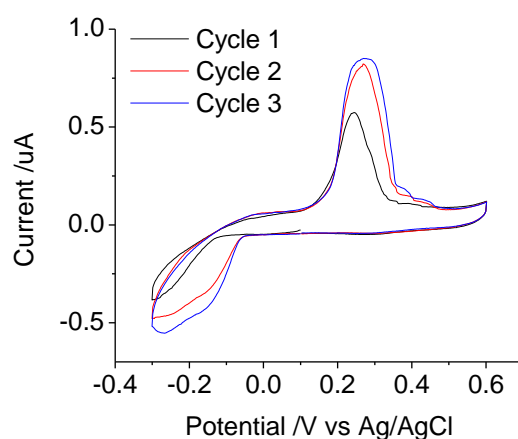

Figure S4: Screen printed planar electrodes with 5 % w/w TCNQ added to the carbon ink working electrode coated with Nafion in 0.1 M NaCl, 50 mM TRIS and HEPES at a scan rate of  $100 \text{ mV s}^{-1}$ .

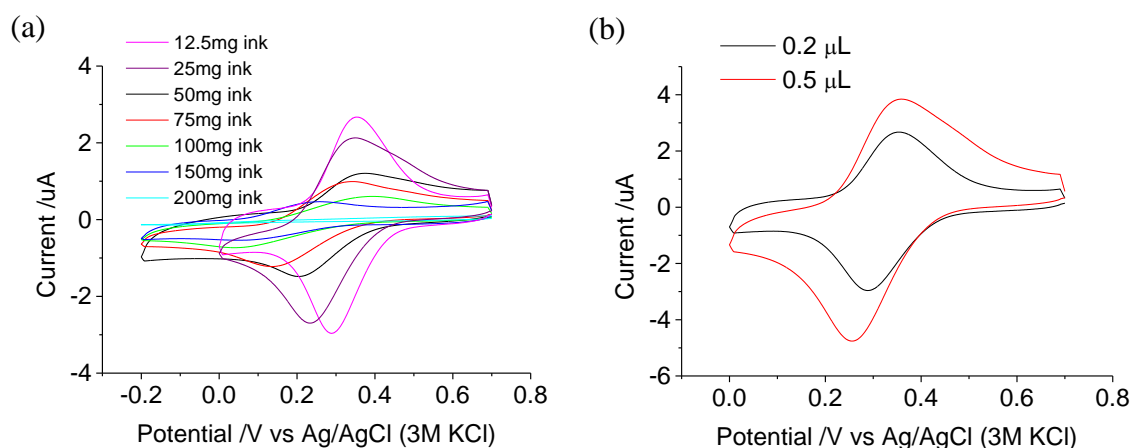

Figure S5. Cyclic voltammetry of a dielectric ink supported thin film VISE with 20 mM Na ionophore VI in 100 mM NaCl at a scan rate of  $100 \text{ mV s}^{-1}$  (a) varying amount of dielectric ink (b) varying volume of thin film.

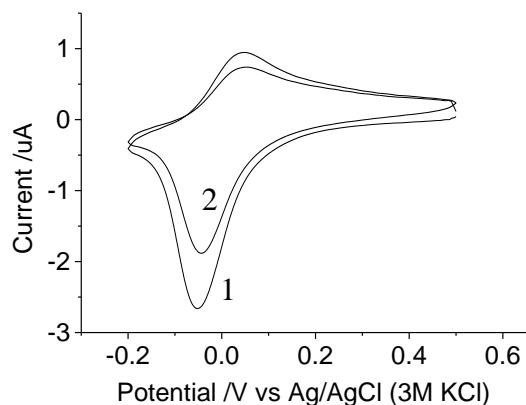

Figure S6. Cyclic voltammety of a dielectric ink supported thin film in 100 mM NaCl at a scan rate of  $100 \text{ mV s}^{-1}$  without ionophore. The numbers 1 and 2 refer to the first and second cycle of the potential respectively.

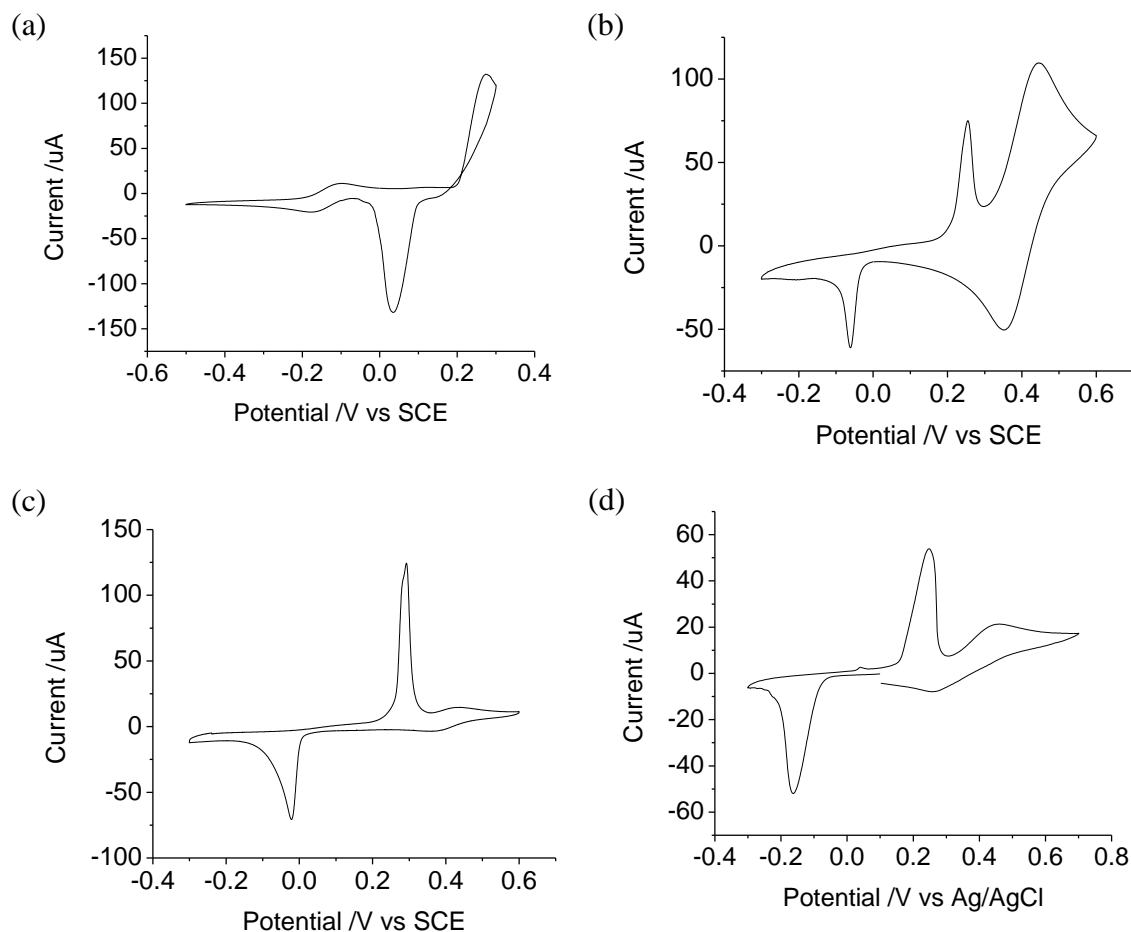

Figure S7: Voltammety in 0.1 M NaCl at a scan rate of  $100 \text{ mV s}^{-1}$  on an EPG electrode of mechanically adhered (a) TTF (0.5 mM 1,4-benzoquinone, 3<sup>rd</sup> potential cycle) and (b) TCNQ (0.1 M TRIS pH9 and 5 mM 1,1'-ferrocenedicarboxylic acid, 3<sup>rd</sup> potential cycle). Mechanically adhered TCNQ coated with Nafion with (c) 1 mM 1,1'-ferrocenedicarboxylic acid, 1 M NaCl, 50mM TRIS and HEPES, 12<sup>th</sup> potential cycle on an EPG electrode at a scan rate of  $200 \text{ mV s}^{-1}$  and (d) mechanically adhered 1,1'-ferrocenedicarboxylic acid in 0.1 M NaCl, 50mM TRIS and HEPES, 1<sup>st</sup> potential cycle on a screen printed electrode at a scan rate of  $100 \text{ mV s}^{-1}$ .

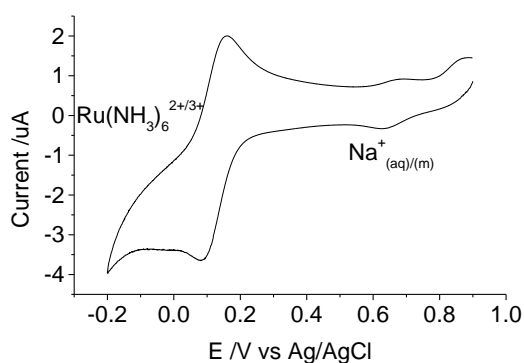

Figure S8. Calibration of a thin film VISE with 10 mM Na ionophore VI in 1 M NaCl at a scan rate of  $100 \text{ mV s}^{-1}$  versus  $\text{Ru}(\text{NH}_3)_6\text{Cl}_3$ .

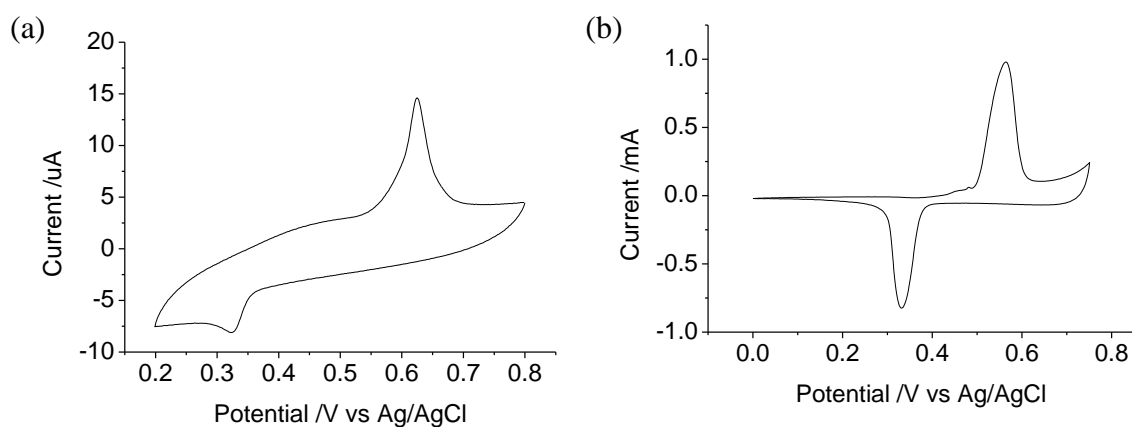

Figure S9: (a) Cyclic voltammetry at an EPG electrode of mechanically adhered TCNQ coated with Nafion at a scan rate of  $100 \text{ mV s}^{-1}$ , 10<sup>th</sup> potential cycle in seawater. (b) 6<sup>th</sup> potential cycle of mechanically adhered TTF on an EPG electrode in seawater at a scan rate of  $100 \text{ mV s}^{-1}$ .

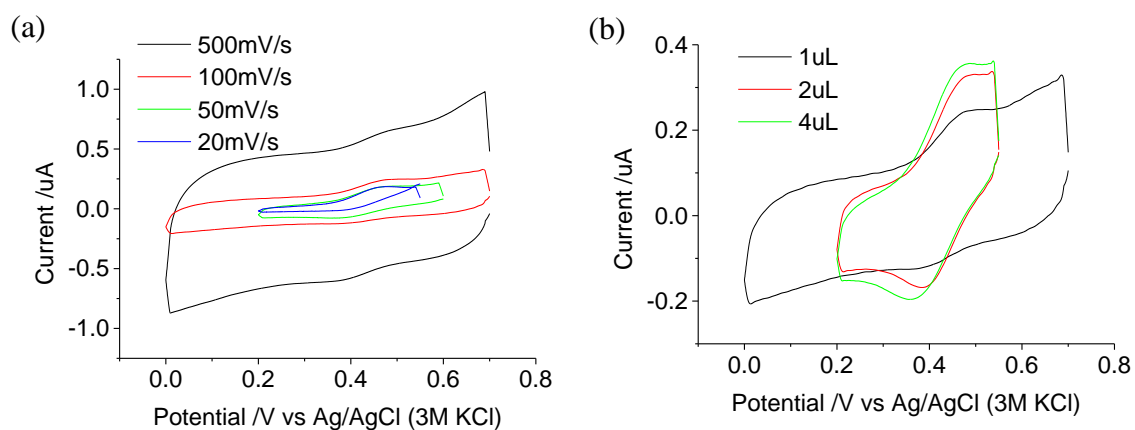

Figure S10. Cyclic voltammetry of a thin film VISE with 20mM Ca ionophore II in plasma varying (a) scan rate of  $100 \text{ mV s}^{-1}$  with a  $1 \mu\text{L}$  thin film (b) thin film thickness at a scan rate of  $100 \text{ mV s}^{-1}$ .

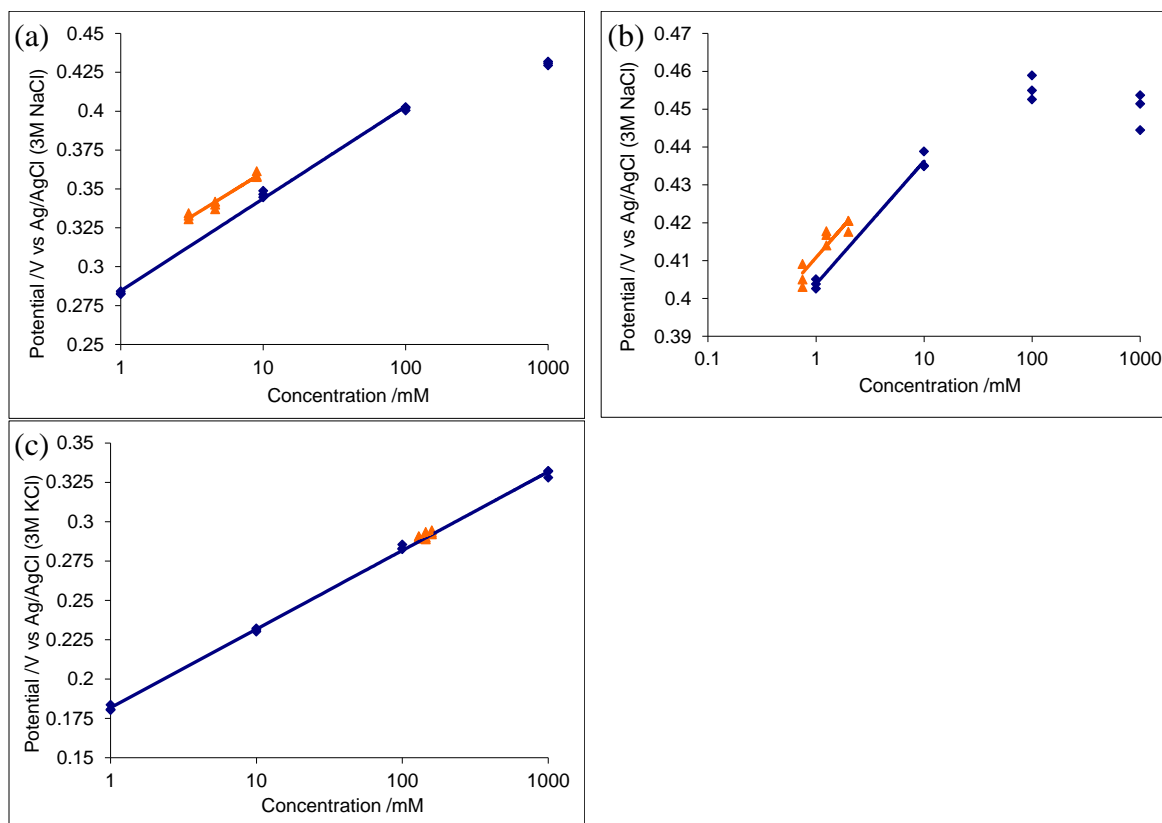

Figure S11. Sensitivity of a 0.2  $\mu\text{L}$  thin film VISE at a scan rate of  $100 \text{ mV s}^{-1}$  varying NaCl concentration in pure electrolyte (blue) or high ionic strength calibrant solutions (orange) with (a) 20 mM K ionophore III, (b) 20 mM Ca ionophore II or (c) 20 mM Na ionophore VI.
